# Supplementary material
Source: Research Square preprint supplement (doi:10.21203/rs.3.rs-9930579/v1)
Supplement: Supplementary file 1 [file 12ab7b19946329674328c050.docx]

| **Work Functions at Work: Observing Contact Electrification**  **at Individual Metal–Metal Heterojunctions** |
| --- |

Supplementary Information

Yufan Zhang,1,2,3 Yan Lu,4 Rafal E. Dunin-Borkowski,4 Michael H. Eikerling,1,2 Tobias Binninger1

*1 Theory and Computation of Energy Materials (IET-3), Institute of Energy Technologies, Forschungszentrum Jülich GmbH, 52425 Jülich, Germany*

*2 Chair of Theory and Computation of Energy Materials, Faculty of Georesources and Materials Engineering, RWTH Aachen University, 52062 Aachen, Germany
3**Fritz Haber Institute of the Max Planck Society, 14195 Berlin, Germany
4**Ernst Ruska-Centre for Microscopy and Spectroscopy with Electrons (ER-C-1), Forschungszentrum Jülich GmbH, 52428 Jülich, Germany*

** Corresponding authors:*

[zhang@fhi-berlin.mpg.de](mailto:zhang@fhi-berlin.mpg.de),

[y.lu@fz-juelich.de](mailto:y.lu@fz-juelich.de),

[t.binninger@fz-juelich.de](mailto:t.binninger@fz-juelich.de)

**Contents**

[Equations of density–potential functional theory (DPFT) 2](#_Toc229354924)

[Parameter calibration 7](#_Toc229354925)

[Scale invariance of the Poisson equation and implication for holographic phase shift 8](#_Toc229354926)

[Electrostatic potential observed in a plan-view geometry 9](#_Toc229354927)

[References 10](#_Toc229354928)

## Equations of density–potential functional theory (DPFT)

The DPFT methodology, used here, has been developed to study both the electronic and ionic degrees of freedom in the electrical double layer (EDL) [1–4]. Initially focused on planar electrodes, we extended the framework to apply to supported electrocatalyst nanoparticles (NP) in our recent publication [5]. In the present study, we adopt the latest version of equations from Ref. [5]. For completeness, we briefly reproduce the key equations and explain the modifications for supported NP systems.

#### Thermodynamic potential for the grand canonical ensemble

The expression for the grand potential functional of a generic solid–liquid interphase reads

|  | (S1) |
| --- | --- |

where , and represent the three contributions to the Helmholtz free energy, namely the quantum part for the metal electrons, the classical part for charged species in electrolyte, and the short-range interactions between metal electrons and classical charged species, respectively. Number density of metal electrons is denoted by and densities of solution species are given by ( for cation, anion, and solvent), with and the corresponding electrochemical potentials.

For a system placed in vacuum, as the main system of this study, there is no electrolyte ion or solvent. In that case, there will be no term related with solution species in , and .

is given by the theory of inhomogeneous electron gas, [6] expressed as follows, [7,8]

|  | (S2) |
| --- | --- |

where is the kinetic energy of non-interacting (subscript “ni”) electrons, and are the exchange and correlation energies, and is the pseudopotential energy of metal electron–core interactions.

is given by the Thomas-Fermi-von Weizsäcker theory, [6,9,10]

|  | (S3) |
| --- | --- |

where is the correction for gradient terms, is the reduced gradient term, and is a parameter tuning the contribution of the gradient term. The term transforms the expression from atomic units to SI units [], with the Hartree energy (the atomic unit of energy), the Bohr radius, the vacuum permittivity, and the elementary charge. Here, .

is written as,

|  | (S4) |
| --- | --- |

with the volumetric exchange energy of a uniform electron gas. is the parameter tuning the contribution of the gradient term in the exchange energy.

is given by

|  | (S5) |  |
| --- | --- | --- |

where is another reduced density gradient in terms of dimensional and coordinates, and is the volumetric correlation energy of a uniform electron gas, for which the interpolation relation of Perdew et al. is used, [8]

|  | (S6) |
| --- | --- |

with .

As only valence electrons are explicitly considered in (10 electrons per Au and Ag atom), the number density of metal atomic-core charges corresponds to 10 positive charges per atom, homogeneously distributed according to a jellium model. A very simple homogeneous pseudopotential within the jellium is utilized to describe the interactions between metal atomic-core charges and valence electrons. The volumetric pseudopotential energy is given by

|  | (S7) |  |
| --- | --- | --- |

where represents the pseudopotential, expressed in Hartree, uniformly distributed within the jellium.

In the subsequent section, we will show that can be calibrated to reproduce the experimental work function.

The classical contributions of free energy, , is given by,

|  | (S) |
| --- | --- |

Here, the first term on the right-hand side represents the self-energy of the electric field, with the optical permittivity, the electric potential. The second term represents the Hartree energy of metal electrons and cationic cores of the electrode.

Written together, Equation (S1) becomes,

|  | (S9) |
| --- | --- |

#### Derivation of controlling equations by minimization of the grand potential

Minimization of the gives the equilibrium profiles of variables, namely, electric potential (), electron density ().

For the distribution of electrons, applying results in

|  | (S10) |
| --- | --- |

Eqn. (S10) needs to be further manipulated to be actually solved numerically. Firstly, it is rewritten using the dimensionless electron density, , with the Bohr radius,

|  | (S11) |
| --- | --- |

The term inside the bracket at the left-hand-side can be written as

|  | (S12) |
| --- | --- |

with .

The first term at the right-hand-side can be written as

|  | (S13) |
| --- | --- |

with

|  | (S14) |
| --- | --- |
|  | (S15) |
|  | (S16) |
|  | (S17) |
|  | (S18) |
|  | (S19) |

After a few arrangements, the controlling equation for the electron density is reformulated as,

|  | (S20) |
| --- | --- |

with .

For better numerical convergence, rather than is solved for. In this way, the issues related to fractional exponents of is bypassed. With and , Eqn. (S20) is transformed to

|  | (S21) |
| --- | --- |

in which the and in the expression of and can be replaced with and , respectively.

Employing the Euler–Lagrange equation with as the variational variable, we arrive the Poisson equation,

| . | (S) |
| --- | --- |

#### Boundary conditions

At the upper boundary in the bulk solution, we set and to zero. The lower boundary of the cell, located in the bulk of the support, as well as the boundary at , demands a zero-gradient condition in normal directions for and .

## Parameter calibration

We calibrate parameters for electronic properties in the electrode–vacuum system to reproduce experimentally observed work function, , for planar Au and Ag surfaces, as summarized in Table S1.

Table S1: Experimental literature references for Φ.

| **Electrode** | **[eV]** |
| --- | --- |
| **pcAu** | 5.20  [11,12] |
| **Ag(100)** | 4.81  [13,14] |

The work function, , is constituted of the chemical potential of electrons, , and the surface potential, . is determined by the volumetric number density of metal core charges, , and the pseudopotential caused by them, . is influenced by . Since is fixed for a specific material, we use as a fitting parameter to reproduce experimentally measured values of , as shown in Table S2.

As in Ref. [4], is calculated by with volumetric number density of metal atomic cores,, number of valence electrons per atom, , mass density, , and the Molar mass, . Parameter values are shown in Table S3.

Table S2: Calibrated electronic parameter values for pc Au and Ag(100) electrodes.

| **Slab** |  |  |  |  |  |  |  |
| --- | --- | --- | --- | --- | --- | --- | --- |
| **pc Au** | 197 | 19.3 | 5.8528 | 11 | 6.4875 | -1.564 |  |
| **Ag(100)** | 108 | 10.5 | 5.8978 | 11 | 6.4381 | 4.243 |  |

The decay of from the constant value in the metal bulk, , to zero outside the metal surface is represented by the error function,

|  | (S) |
| --- | --- |

with the characteristic decay length assumed to be one Bohr radius. The calibration of for Ag(100) and pcAu is done by adjusting , the values of which can be found in Table S2.

## Scale invariance of the Poisson equation and implication for holographic phase shift

In the vacuum region bounded by the external surfaces of the NP and the support, the electrostatic potential satisfies the Poisson equation,

|  | (S) |
| --- | --- |

We will demonstrate here that is self-similar under the geometric transform . In other words, if the crystal dimensions are homogeneously expanded by a factor , keeping all angles fixed, the potential is globally unchanged. The phase shifts, being the line integral of this potential, are therefore proportional to the length of the integral paths, *viz.*, the side length of the simulation cells. With the NP coverage on the support kept constant, the phase shifts scale linearly with the NP size.

**1. Stretching of spatial coordinates**

Now consider stretching the system uniformly by a factor of *λ*, after which every spatial coordinate . We define a scaled potential

|  | (S) |
| --- | --- |

where accounts for the change of the boundary conditions after stretching of the system, *viz.*, potential difference between the external surfaces of the NP and the support, .

**2. Laplace equation invariance**

Taking the second derivative of with respect to gives

|  | (S) |
| --- | --- |

Because satisfies , the right-hand side is also zero. This means automatically satisfies the Laplace equation. In other words, the Laplace equation is invariant under geometric scaling. The potential distribution remains the same pattern, but its amplitude scales by a factor of due to the size-dependent NP work function.

**3. Consequence for holographic phase shift**

The holographic phase shift is proportional to the line integral of the potential along the electron beam direction (for example, the z-axis):

|  | (S) |
| --- | --- |

When the coordinates are scaled by , the integration path also becomes times longer, and the potential amplitude changes by the factor . Therefore, the phase shift in the scaled system becomes

|  | (S) |
| --- | --- |

This means the holographic phase shift scales linearly with the system size, and proportionally to the potential difference between boundaries.

This derivation relies on the linearity of the Laplace operator and fixed (Dirichlet) boundary conditions. The scaling may break down when quantum effects (such as finite Thomas–Fermi screening) become significant at very small scales. While electrostatics obeys geometric scaling, the Thomas–Fermi screening length is a fixed quantity (~0.5 Å). Consequently, regions such as corners or edges with dimensions comparable to this length are governed by a combination of electrostatic and electronic effects, and therefore do not scale with the overall system size. The scaling relationship thus holds well for larger NPs, where the relative proportion of corners and edges is small.

## Electrostatic potential observed in a plan-view geometry

The TEM grid used in this study consists of 300-mesh Au with thickness of ~ 30 µm and R2/2 50-nm-thick Au film. Along the breaking edge, the Ag NP have two positions as shown in Figs. S1a and b, and the electron holographic results refer to the former schematic. Figs. S1c and d display the plan-view geometry of both positions, in which the positive charge on Ag NP and negative charge on Au substrate are shown only for schematically and do not represent the actual charge density distribution. When observing from the plan-view, the electrostatic potential in Fig. S1c exists but invisible because of electronic impenetrability, while in the situation of Fig. S1d, the projected electrostatic potential in the vacuum area is weak, and the visibility might depend on the phase precision.

**Figure S1** (a,b) Schematic of two positions of Ag NP on Au substrate. (c,d) The corresponding plan-view including the charge distribution.

## References

[1] J. Huang, Mixed quantum-classical treatment of electron transfer at electrocatalytic interfaces: Theoretical framework and conceptual analysis, J Chem. Phys. **153**, 164707 (2020).

[2] J. Huang, Hybrid density-potential functional theory of electric double layers, Electrochim. Acta **389**, 138720 (2021).

[3] J. Huang, S. Chen, and M. Eikerling, Grand-Canonical Model of Electrochemical Double Layers from a Hybrid Density–Potential Functional, J. Chem. Theory Comput. **17**, 2417 (2021).

[4] J. Huang, Density-Potential Functional Theory of Electrochemical Double Layers: Calibration on the Ag(111)-KPF6 System and Parametric Analysis, J. Chem. Theory Comput. **19**, 1003 (2023).

[5] Y. Zhang, T. Binninger, J. Huang, and M. H. Eikerling, Theory of Electro-Ionic Perturbations at Supported Electrocatalyst Nanoparticles, Phys. Rev. Lett. **134**, 066201 (2025).

[6] S. Lundqvist and N. H. March, *Theory of the Inhomogeneous Electron Gas* (Springer Science & Business Media, 2013).

[7] W. Kohn and L. J. Sham, Self-Consistent Equations Including Exchange and Correlation Effects, Phys. Rev. **140**, 4A (1965).

[8] J. P. Perdew and S. Kurth, *Density Functionals for Non-Relativistic Coulomb Systems in the New Century*, in *A Primer in Density Functional Theory*, edited by C. Fiolhais, F. Nogueira, and M. A. L. Marques (Springer Berlin Heidelberg, Berlin, Heidelberg, 2003), pp. 1–55.

[9] L. H. Thomas, The calculation of atomic fields, Math. Proc. Camb. Philos. Soc. **23**, 5 (1927).

[10] E. Fermi, Eine statistische Methode zur Bestimmung einiger Eigenschaften des Atoms und ihre Anwendung auf die Theorie des periodischen Systems der Elemente, Z. Physik **48**, 73 (1928).

[11] E. E. Huber Jr., The Effect of Mercury Contamination on the Work Function of Gold, Appl. Phys. Lett. **8**, 169 (2004).

[12] R. P. W. Lawson and G. Carter, The Desorption of Mercury and the Work Function of Polycrystalline Gold, Appl. Phys. Lett. **9**, 85 (2004).

[13] M Chelvayohan and C H B Mee, Work function measurements on (110), (100) and (111) surfaces of silver, J Phys. C: Solid State Phys. **15**, 2305 (1982).

[14] H. E. Farnsworth and R. P. Winch, Photoelectric Work Functions of (100) and (111) Faces of Silver Single Crystals and Their Contact Potential Difference, Phys. Rev. **58**, 812 (1940).
